## **Overweight and Obesity among Women at Reproductive Age 15-49 Years Old in Cambodia: Data Analysis of Cambodia Demographic and Health Survey 2014**

Samnang Um<sup>1\*</sup>, An Yom<sup>1</sup>, Heng Sopheab<sup>1</sup>

1- School of Public Health at the National Institute of Public Health, Cambodia

\*Corresponding authors:

Samnang Um, email: [umsamnang56@gmail.com](mailto:umsamnang56@gmail.com),

[ORCID: <https://orcid.org/0000-0002-1521-1260>],

An Yom, email: [anyomniph@gmail.com](mailto:anyomniph@gmail.com),

Heng Sopheab, email: [hsopheab@niph.org.kh](mailto:hsopheab@niph.org.kh),

[ORCID: <https://orcid.org/0000-0002-6553-1334>]

Address: Lot#80, 289 Samdach Penn Nouth St. (289), Phnom Penh

## **Abstract**

### **Introduction**

Overweight and obesity are known the risk factors for non-communicable diseases (NCDs). They are the leading risks of global deaths with at least 2.8 million adults dying annually. In Cambodia, the prevalence of overweight and obesity among women aged 15-49 years increased from 6% in 2000 to 18% in 2014, becoming a public health burden. We aimed to examine the socio-demographic and behavioral factors associated with overweight and obesity among women of reproductive age.

### **Methods**

We analyzed existing data from Cambodia Demographic and Health Survey (CDHS) 2014 which used a two-stage stratified cluster sampling approach to select samples. Data analysis was restricted to only non-pregnancy with total eligible women of 10,818. Multivariable logistic regressions were performed using STATA V16 to assess the determinants of overweight and obesity, taking into account the sampling weight in the analysis.

### **Results**

Overweight and obesity were 15.2% and 2.8% respectively. Factors independently associated with increased odds of overweight and obesity including women aged 20-29 years with adjusted odds ratio [AOR=2.4; 95% CI: 1.6-3.6], 30-39 years [AOR=4.6; 95% CI: 3.0-6.9], and 40-49 years [AOR=6.6; 95% CI: 4.3-10.1], married women [AOR=1.8; 95% CI: 1.3-2.7], urban residence [AOR=1.3; 95% CI: 1.1-1.5], and women having at least 4 children [AOR=1.7; 95% CI: 1.2-2.5]. However, following factors were found to be associated with decreased odds of overweight and obesity: completed at least secondary education [AOR=0.7; 95% CI: 0.6-0.8], agricultural work [AOR=0.7; 95% CI: 0.5-0.8], and manual labor work [AOR=0.7; 95% CI: 0.6-0.9].

### **Conclusions**

Increased age, married women, living in urban residence, and having at least four children were the main predictors of overweight and obesity; while higher education, working in agriculture,

and working in manual labor were the main predictors associated with less overweight and obesity. Therefore, Cambodia's NCD public health programs should consider those main predictors to further reduce overweight and obesity in the coming years.

**Keywords:** Overweight, obesity, non-communicable diseases, NCDs, women at reproductive age, CDHS, Cambodia

## Introduction

The World Health Organization (WHO) defined overweight and obesity as abnormal body mass index (BMI), calculated as an individual weight in kilograms divided by the square of height in meters ( $\text{kg/m}^2$ ) [1]. Overweight and obese women of reproductive age (WRA) 15-49 years old are at increased risk for non-communicable diseases (NCDs) including cardiovascular disease, type 2 diabetes mellitus, hypertension, stroke, and some type of cancers, and risk for maternal health [2, 3]. According to WHO, overweight and obesity are the leading risks for global deaths with at least 2.8 million adults dying annually [1]. Globally, 2 billion adults aged 18 years and older were overweight, and 650 million were obese in 2016 [1]. The report indicated that overweight and obesity were higher in women than men in both developed and developing countries, for instance, obesity was 15% in women compared to 11% in men [1, 3]. Also, the Global Nutrition Report 2019 showed that 26.1% of women and 20.4% of men were overweight, while obesity was 6.3% in women compared to 3.5% in men [4]. Based on the Cambodia Demographic and Health Survey (CDHS) 2014, overweight and obesity increased from 6% in 2000 to 18% in 2014 [5]. It was estimated that overweight and obesity contribute to rising healthcare costs in Cambodia approximately 1.7% of its annual gross domestic product (GDP) per capita and is a major contributor to mortality and decreased general health and productivity [6].

Previous literature indicated that factors that significantly predicted overweight and obesity included women living in high socioeconomic status, increasing older age, married women, living in an urban residence, and women's had no educated [7, 8]. Moreover, formally employed women had higher odds of being overweight and obesity than informally employed [9]. Also, women who used hormonal contraceptives such as oral contraceptive pills, implants, patches, and rings were at higher risk of being overweight and obese [10]. Globally, it reported that 30% of daily smokers are overweight or obese [11]. Particularly, women smokers had higher odds of being overweight and obese than men smokers [12, 13]. Despite of availability of international literature in this, to our knowledge, the contributing factors associated with overweight and obesity have not been explored among WRA in Cambodia. Therefore, we aimed to examine the socio-demographic and behavioral factors associated with overweight and obesity among WRA.

## Methods

### Data source

We used women's dataset from CDHS 2014, which was a nationally representative population-based household survey. Two-stage stratified cluster sampling was used to collect the samples. In the first stage, clusters or enumeration areas (EAs) stratified by urban-rural were selected from the sampling frame using probability proportional to cluster size. In the second stage, a defined number of households, generally 25-30, were selected from the list of households in each EA using the systematic sampling. Eligible WRA 15-49 years in the selected households were invited for the interview. In total, 17,578 women aged 15-49 years were interviewed. However, we restricted only non-pregnant women aged 15-49 years with available BMI data, by excluding 974 pregnant women and 5,786 women with missing BMI data. Finally, 10,818 samples of WRA were included in the analysis.

### Outcome variable

BMI was measured as follows: underweight ( $< 18.0 \text{ kg/m}^2$ ), normal weight ( $18.5-24.9 \text{ kg/m}^2$ ), overweight ( $25.0-29.9 \text{ kg/m}^2$ ) and obesity ( $\geq 30.0 \text{ kg/m}^2$ ) [5]. Binary outcome was defined for women having BMI  $\geq 25.0 \text{ kg/m}^2$  were classified as overweight and obese (coded = 1), while women with BMI  $< 25.0 \text{ kg/m}^2$  were coded otherwise (coded = 0).

### Explanatory variables

Explanatory variables included socio-demographic characteristics and behavioral factors: Women's age (15-19, 20-29, 30-39, 40-49), marital status (not married, married or living together, and divorced or widowed or separated), education level (no education, primary, secondary and higher), occupation (not working, agriculture, manual labor or unskilled, professional or sealer or services), wealth index (rich, middle, and poor), residence (urban vs. rural), number of children ever born (no children, one child, two-three children, four and more children), smoking (yes vs no), contraceptive usage (not used, hormonal methods (using a pill, Norplant, injection, and vaginal rings), non-hormonal methods (condoms, the diaphragm, the IUD, spermicides, lactational amenorrhea, and sterilization), and traditional methods (periodic abstinence and withdrawal).

## **Statistical analysis**

Data analyses were performed using STATA version 16 (Stata Corp 2017, College Station, TX) by taking sampling weight and complex survey design into account. Socio-demographic characteristics and behavioral factors were described in weighted frequency and percentage. Bivariate analysis with chi-square test was used to assess the significant association between explanatory variables and overweight and obesity. A significance level of covariates at p-value  $\leq 0.10$  were included in the binary multivariate logistic regression analysis [14-16]. All covariates such as women's age, wealth index, and residence were included regardless their significance level.

Binary logistic regression was used to determine the magnitude effect of the unadjusted association between overweight and obesity with socio-demographic characteristics and behavioral factors reported as odds ratios (OR) with 95% confidence intervals (CI). Then, multivariate logistics regression was used to assess the main predictors, reported as adjusted odds ratios (AOR) of overweight and obesity after adjusting potential confounding factors in the model. Multicollinearity was checked for some original variables including women's age and the number of children ever born, education, and wealth index.

## **Ethical approval**

The CDHS 2014 was approved by the Cambodia National Ethics Committee for Health Research (Ref: # 056 NECHR) and the Institutional Review Board (IRB) of ICF in Rockville, Maryland, USA. The CDHS data are publicly accessible and were made available to the researchers upon request to the DHS Program, ICF at [https://www.dhsprogram.com/data/dataset\\_admin](https://www.dhsprogram.com/data/dataset_admin).

## **Results**

### **Characteristics of the study samples**

The mean age of women was 30 years old (SD = 9.9 years) in which age group 20-39 years old accounted for 60.4%. Almost 66.0% were married; 48.4% completed their primary education and 13.6% did not receive formal schooling. A total of 34.2% of women did agricultural work,

21.4% were unemployed. Of the total samples, 36.4% women were from the poor households. The majority (80.7%) of women resided in rural areas. More than one third had two-three children and 31% had no children. Only 2.2% of women reported cigarette smoking, 7.2% reported using hormonal contraceptives. Mean women's BMI was 22 kg/m<sup>2</sup> (SD = 3.6 kg/m<sup>2</sup>) and 15.2% and 2.8% were overweight and obese respectively (**Table 1**).

**Table 1.** Socio-demographic characteristics and behaviors of the weighted samples of women aged 15-49 years old in Cambodia, 2014 (N=10,765, weighted count)

| Variables                             | Freq. | %           |
|---------------------------------------|-------|-------------|
| <b>Women's mean age in years (SD)</b> |       | 30.0 (9.9)  |
| 15-19                                 | 1741  | 16.2        |
| 20-29                                 | 3553  | <b>33.0</b> |
| 30-39                                 | 2946  | 27.4        |
| 40-49                                 | 2526  | 23.5        |
| <b>Marital status</b>                 |       |             |
| Not married                           | 2846  | 26.4        |
| Married or living together            | 7096  | <b>65.9</b> |
| Widowed/divorced/separated            | 823   | 7.6         |
| <b>Education</b>                      |       |             |
| No education                          | 1459  | <b>13.6</b> |
| Primary                               | 5214  | 48.4        |
| Secondary and higher                  | 4092  | 38.0        |
| <b>Current work status</b>            |       |             |
| Not working                           | 2307  | 21.4        |
| Agricultural                          | 3681  | <b>34.2</b> |
| Professional                          | 2585  | 24.0        |
| Manual labor and unskilled            | 2190  | 20.3        |
| <b>Wealth index</b>                   |       |             |
| Poor                                  | 3915  | <b>36.4</b> |
| Middle                                | 2064  | 19.2        |
| Rich                                  | 4786  | 44.5        |
| <b>Place of residence</b>             |       |             |
| Rural                                 | 8687  | <b>80.7</b> |
| Urban                                 | 2078  | 19.3        |
| <b>Number of children born</b>        |       |             |
| 0                                     | 3321  | 30.9        |
| 1                                     | 1721  | 16.0        |
| 2-3                                   | 3553  | 33.0        |

|                                          |       |             |
|------------------------------------------|-------|-------------|
| 4+                                       | 2170  | <b>20.2</b> |
| <b>Smoking status</b>                    |       |             |
| Did not smoke                            | 10530 | 97.8        |
| Smoked cigarettes/tobacco                | 235   | <b>2.2</b>  |
| <b>Ever report of contraceptive use</b>  |       |             |
| No method                                | 6399  | <b>59.4</b> |
| Traditional method                       | 2223  | 20.6        |
| Non-hormonal method                      | 1370  | 12.7        |
| Hormonal method                          | 774   | 7.2         |
| <b>BMI mean in kg/m<sup>2</sup> (SD)</b> |       | 22.0 (3.6)  |
| Underweight                              | 1501  | 13.9        |
| Normal weight                            | 7327  | 68.1        |
| Overweight                               | 1637  | <b>15.2</b> |
| Obese                                    | 300   | <b>2.8</b>  |

### Factors associated with overweight and obesity in bivariate analysis

As shown in **Table 2**, socio-demographic profiles were significantly associated with overweight and obesity. Women's older age group 40-49 years (31%) had higher overweight/obesity than younger age groups, (p value <0.001), married women (22.9%) compared to others, (p value <0.001). Women with no education (22.4%) had higher overweight/obesity than higher education, (p value <0.001). Women with professional job (28.4%) and women from the rich wealth quintile (21.4%) had higher overweight and obesity than other jobs and poor household wealth quintile (p value <0.001). In addition, women who lived in urban areas had a higher prevalence of overweight and obesity than those living in rural areas (22.4% vs 16.9%, p value <0.001). Overweight/obesity increased with parity. Women reported at least four children had a significantly highest overweight and obesity (29.3%), (p value < 0.001). Likewise, women used non-hormonal contraceptives methods had a significant higher proportion of overweight and obesity (27.7%) than women using other methods (p value <0.019).

**Table 2.** Factors associated with overweight and obesity among women aged 15-49 years, in bivariate analysis (N=10,765, weighted count)

| Characteristics | Overweight/Obese<br>(n=1,937) | Normal/Underweight<br>(n=8,828) | P-value |
|-----------------|-------------------------------|---------------------------------|---------|
|-----------------|-------------------------------|---------------------------------|---------|



|                                     | Freq. | %           | Freq. | %    |                  |
|-------------------------------------|-------|-------------|-------|------|------------------|
| <b>Women's age group in years</b>   |       |             |       |      |                  |
| 15-19                               | 51    | 2.9         | 1690  | 97.0 |                  |
| 20-29                               | 390   | 11.0        | 3162  | 89.0 | <b>&lt;0.001</b> |
| 30-39                               | 705   | 24.0        | 2241  | 76.0 |                  |
| 40-49                               | 790   | <b>31.0</b> | 1735  | 69.0 |                  |
| <b>Marital status</b>               |       |             |       |      |                  |
| Not married                         | 159   | 5.6         | 2688  | 94.4 |                  |
| Married or living together          | 1628  | <b>22.9</b> | 5468  | 77.1 | <b>&lt;0.001</b> |
| Widowed/divorced/separated          | 151   | 18.3        | 672   | 81.7 |                  |
| <b>Education</b>                    |       |             |       |      |                  |
| No education                        | 327   | <b>22.4</b> | 1132  | 77.6 |                  |
| Primary                             | 1051  | 20.2        | 4164  | 79.8 | <b>&lt;0.001</b> |
| Secondary and higher                | 559   | 13.7        | 3532  | 86.3 |                  |
| <b>Current work status</b>          |       |             |       |      |                  |
| Not working                         | 381   | 16.5        | 1926  | 83.5 |                  |
| Agricultural                        | 596   | 16.2        | 3085  | 83.8 |                  |
| Professional                        | 675   | <b>26.1</b> | 1910  | 73.9 | <b>&lt;0.001</b> |
| Manual labor and unskilled          | 285   | 13.0        | 1905  | 87.0 |                  |
| <b>Wealth index</b>                 |       |             |       |      |                  |
| Poor                                | 543   | 13.9        | 3372  | 86.1 |                  |
| Middle                              | 368   | 17.8        | 1696  | 82.2 | <b>&lt;0.001</b> |
| Rich                                | 1026  | <b>21.4</b> | 3760  | 78.6 |                  |
| <b>Place of residence</b>           |       |             |       |      |                  |
| Rural                               | 1470  | 16.9        | 7217  | 83.1 |                  |
| Urban                               | 466   | <b>22.4</b> | 1612  | 77.6 | <b>&lt;0.001</b> |
| <b>Number of children ever born</b> |       |             |       |      |                  |
| 0                                   | 215   | 6.5         | 3106  | 93.5 |                  |
| 1                                   | 238   | 13.8        | 1483  | 86.2 | <b>&lt;0.001</b> |
| 2-3                                 | 847   | 23.8        | 2706  | 76.2 |                  |
| 4+                                  | 636   | <b>29.3</b> | 1533  | 70.7 |                  |
| <b>Smoking status</b>               |       |             |       |      |                  |
| Did not smoke                       | 1907  | 18.1        | 8623  | 81.9 | 0.108            |
| Smoked cigarettes/tobacco           | 30    | 12.7        | 205   | 87.3 |                  |

### Ever report of contraceptive use

|                     |     |             |       |      |                  |
|---------------------|-----|-------------|-------|------|------------------|
| No method           | 964 | 15.1        | 5435  | 84.9 |                  |
| Traditional method  | 294 | 21.5        | 1076  | 78.6 |                  |
| Non-hormonal method | 214 | <b>27.7</b> | 559.2 | 72.3 | <b>&lt;0.001</b> |
| Hormonal method     | 465 | 20.9        | 1758  | 79.1 |                  |

### Factors associated with overweight and obesity in multivariate logistic regression

As shown in **Table 3**, several factors were independently associated with increased odds of having overweight and obesity among women. These factors included age group 20-29 years [AOR=2.4; 95% CI: 1.6-3.6], 30-39 years [AOR=4.6; 95% CI: 3.0-6.9] and 40-49 years [AOR=6.6; 95% CI: 4.3-10.1] married [AOR=1.8; 95% CI: 1.3-2.7], women who had professional job [AOR=1.3; 95% CI: 1.0-1.5], living in urban residence [AOR=1.3; 95% CI: 1.1-1.5], middle wealth quintile [AOR=1.4; 95% CI: 1.1-1.8], and rich wealth quintile [AOR=1.8; 95% CI: 1.5-2.1], having at least two-three children or more. On the contrary, following factors were independently associated with decreased odds of having overweight and obese: women with higher education [AOR=0.7; 95% CI: 0.6-0.8], working in agricultural jobs [AOR=0.7; 95% CI: 0.5-0.8], and in manual labor jobs [AOR=0.7; 95% CI: 0.6-0.9].

**Table 3.** Risk factors associated with overweight and obesity in multivariate logistic regression analysis

| Characteristics                   | Total (N=10,765) |           |         | Total (N=10,761) |                 |                  |
|-----------------------------------|------------------|-----------|---------|------------------|-----------------|------------------|
|                                   | OR               | 95% CI    | P value | AOR              | 95% CI          | P value          |
| <b>Women's age group in years</b> |                  |           |         |                  |                 |                  |
| 15-19                             | 1.0              | Ref.      |         | 1.0              | Ref.            |                  |
| 20-29                             | 4.1              | 2.8-5.8   | <0.001  | <b>2.4</b>       | <b>1.6-3.6</b>  | <b>&lt;0.001</b> |
| 30-39                             | 10.4             | 7.3-14.6  | <0.001  | <b>4.6</b>       | <b>3.0-6.9</b>  | <b>&lt;0.001</b> |
| 40-49                             | 15.0             | 10.6-21.2 | <0.001  | <b>6.6</b>       | <b>4.3-10.1</b> | <b>&lt;0.001</b> |
| <b>Marital status</b>             |                  |           |         |                  |                 |                  |
| Not married                       | 1.0              | Ref.      |         | 1.0              | Ref.            |                  |
| Married or living together        | 5.0              | 4.2-6.1   | <0.001  | <b>1.8</b>       | <b>1.3-2.7</b>  | <b>0.002</b>     |

|                                         |     |         |        |            |                |                  |
|-----------------------------------------|-----|---------|--------|------------|----------------|------------------|
| Widowed/divorced/separated              | 3.8 | 2.9-5.0 | <0.001 | 1.1        | 0.7-1.7        | 0.638            |
| <b>Education level</b>                  |     |         |        |            |                |                  |
| No education                            | 1.0 | Ref.    |        | 1.0        | Ref.           |                  |
| Primary education                       | 0.9 | 0.7-1.0 | 0.150  | 0.9        | 0.8-1.1        | 0.495            |
| Secondary and higher                    | 0.6 | 0.5-0.7 | <0.001 | <b>0.7</b> | <b>0.6-0.8</b> | <b>0.001</b>     |
| <b>Current work status</b>              |     |         |        |            |                |                  |
| Not working                             | 1.0 | Ref.    |        | 1.0        | Ref.           |                  |
| Professional                            | 1.8 | 1.5-2.2 | <0.001 | <b>1.3</b> | <b>1.0-1.5</b> | <b>0.025</b>     |
| Agricultural                            | 1.0 | 0.8-1.2 | 0.827  | <b>0.7</b> | <b>0.5-0.8</b> | <b>0.001</b>     |
| Manual labor and unskilled              | 0.8 | 0.6-1.0 | 0.025  | <b>0.7</b> | <b>0.6-0.9</b> | <b>0.011</b>     |
| <b>Wealth index</b>                     |     |         |        |            |                |                  |
| Poor                                    | 1.0 | Ref.    |        | 1.0        |                |                  |
| Middle                                  | 1.4 | 1.1-1.7 | 0.009  | <b>1.4</b> | <b>1.1-1.8</b> | <b>0.003</b>     |
| Rich                                    | 1.7 | 1.5-2.0 | <0.001 | <b>1.8</b> | <b>1.5-2.1</b> | <b>&lt;0.001</b> |
| <b>Place of residence</b>               |     |         |        |            |                |                  |
| Rural                                   | 1.0 | Ref.    |        | 1.0        | Ref.           |                  |
| Urban                                   | 1.4 | 1.2-1.6 | <0.001 | <b>1.3</b> | <b>1.1-1.5</b> | <b>0.006</b>     |
| <b>Number of children ever born</b>     |     |         |        |            |                |                  |
| 0                                       | 1.0 | Ref.    |        | 1.0        | Ref.           |                  |
| 1                                       | 2.3 | 1.9-2.9 | <0.001 | 1.1        | 0.8-1.7        | 0.505            |
| 2-3                                     | 4.5 | 3.8-5.4 | <0.001 | <b>1.5</b> | <b>1.1-2.2</b> | <b>0.026</b>     |
| 4+                                      | 6.0 | 4.9-7.3 | <0.001 | <b>1.7</b> | <b>1.1-2.5</b> | <b>0.008</b>     |
| <b>Smoking status</b>                   |     |         |        |            |                |                  |
| Did not smoke                           | 1.0 | Ref.    |        | -          | -              |                  |
| Smoked cigarettes/tobacco               | 0.7 | 0.4-1.1 | 0.111  | -          | -              |                  |
| <b>Ever report of contraceptive use</b> |     |         |        |            |                |                  |
| No method                               | 1.0 | Ref.    |        | 1.0        | Ref.           |                  |
| Traditional method                      | 1.5 | 1.3-1.9 | <0.001 | 0.8        | 0.6-1.1        | 0.052            |
| Non-hormonal method                     | 2.2 | 1.7-2.7 | <0.001 | 1.0        | 0.8-1.3        | 0.769            |
| Hormonal method                         | 1.5 | 1.3-1.7 | <0.001 | 1.0        | 0.8-1.1        | 0.554            |

**OR:** Unadjusted odds ratios, **AOR:** Adjusted odds ratios, **95% CI:** 95% confidence interval

## Discussion

This study found several main predictors of increased odds of having overweight and obese includes older age, increased parity, current married, urban residence, middle and rich wealth quintiles, and working in professional job. However, women with higher education, working in agricultural and in manual labor jobs had decreased odds of having overweight and obesity.

Once the women got older, they were more likely to develop overweight and obesity as compared to young women aged 15-19 years due to many reasons. This was consistent with other studies showed that obesity was more prevalent in older WRA [17]. The risk of women becoming overweight and obese rises with age, possibly due to unhealthy fatty food consumption and a lack of physical activities and related housework chores [18]. Despite this, women with high education are less likely to develop overweight and obesity than those no school due to their knowledgeable awareness. Studies in Nigeria, and South Korea reported that educated women had a lower risk of being overweight and obesity likely may be linked to their education that influence their healthy behavior [19-22]. Education is one of the most important social predictors of women's health behaviors and health outcomes, including diet, physical activity [23]. Furthermore, women better socioeconomic status and live in urban had higher odds of being overweight and obese. linked to previous research [24, 25]. May women live in urban areas with high income may choose to use cars and other fuel-based vehicles, leaving them less opportunity for walking and physical activity and increasing the risk of higher consumption of fast food. Women with higher socioeconomic status tend to use more improved technologies for a more comfortable lifestyle [26, 27]. Women have at least two and more children at risk of being overweight and obese, similar other studies [28]. It may during pregnancy, some factors such as stress, depression and anxiety may also play role in hypothalamic- pituitary-adrenal hyperactivity [29, 30]. Women with several children may have gained weight as a result of their reduced physical activity and have less time to focus on health behaviors including weight management.

This study has some limitations. It was a cross-sectional study design; it does not indicate causality. Additionally, this study used exit secondary data, on the factors that may be relevant to overweight and obesity such as, level physical activity, dietary intake, sweet food or soft drink, alcohol consumption, family history, and awareness about overweight and obesity were not included into analysis processing due to data limitations. Finally, these data were gathered in

2014 and may no longer reflect the present conditions of non-pregnant women in Cambodia, a subsequent study should further evaluate these relationships and the general prevalence of overweight and obesity among non-pregnant Cambodian women once additional data becomes available (the next round of data gathering of Cambodia DHS data is currently underway, but has experienced delays due to COVID-19). However, this study has several strengths. First, a nationally representative sample was used for this study. Thus, this large sample size, a high response rate of 97%, and the use of valid survey methods including calibrated measurement tools, and highly trained data collectors, all of which limited the possibility of measurement error, the complex survey data analysis taking sampling weight into account in the survey lead to the study's credibility. Therefore, the findings from this study can be generalizable to non-pregnant women in Cambodia.

In conclusion, this study indicated the risk factors of associated with overweight and obesity are, commonly linked to higher socio-demographic characteristics including older age group, urban women, education level, high income and life style, or behavioral factors such as working types. Therefore, it is crucial to design overweight and obesity program interventions with specific targeted on these socio-demographic determinants such as on older age, urban residence, high income group, a professional job. Needs for raising awareness on the health promotion around healthy eating food, and the benefit of regular physical activity should be addressed, especially among older women and those women with professional jobs

## **Acknowledgments**

The authors would like to thank DHS-ICF, who approved the data used for this paper.

## **Authors' Contributions**

**Um S.** contributed to conceptualization, methods, data analysis, and writing original draft, writing review & editing; **An Y.** contributed to writing review & editing manuscript. **Sopheab H.** contributed to writing review & editing manuscript. All authors read and approved the final manuscript.

## **Data Availability**

Our study used the 2014 Cambodia Demographic and Health Survey (CDHS) datasets. The DHS data are publicly available from the website: [https://www.dhsprogram.com/data/dataset\\_admin](https://www.dhsprogram.com/data/dataset_admin)

## Funding

The authors received no funding support for this study.

## Competing interests

The authors have declared that no competing interests exist.

## Abbreviations

BMI, Body mass index; NCDs, Non-communicable diseases; WHO, World Health Organization; CDHS, Cambodia Demographic Health Survey; WRA, Women reproductive age; AOR, Adjusted odds ratio; PPS, Probability proportional to size. EA, Enumeration areas.

## References

1. WHO: World Health Organization, Obesity and overweight; [<https://www.who.int/news-room/fact-sheets/detail/obesity-and-overweight>]; Accessed on July 12, 2022.
2. Leddy MA, Power ML, Schulkin J: The impact of maternal obesity on maternal and fetal health. *Reviews in obstetrics and gynecology* 2008, 1(4):170.
3. WHO: World Health Organization, Noncommunicable diseases: Mortality; [<https://www.who.int/data/gho/data/themes/topics/topic-details/GHO/ncd-mortality>]; Accessed on July 12, 2022.
4. Report GN: Country Nutrition Profiles: [<https://globalnutritionreport.org/resources/nutrition-profiles/asia/south-eastern-asia/cambodia/>]; Accessed on July 12, 2022. 2022.
5. NIS: National Institute of Statistics. Directorate General for HC. International ICF . Cambodia Demographic and Health Survey 2014. Phnom Penh, Cambodia: National Institute of Statistics/Cambodia, Directorate General for Health/Cambodia, and ICF International; 2015. 2014.
6. World Food Programme in Cambodia; [<https://www.wfp.org/countries/cambodia>]; Accessed on July 13, 2022.
7. Abrha S, Shiferaw S, Ahmed KY: Overweight and obesity and its socio-demographic correlates among urban Ethiopian women: evidence from the 2011 EDHS. *BMC Public Health* 2016, 16(1):636.
8. Balarajan Y, Villamor E: Nationally representative surveys show recent increases in the prevalence of overweight and obesity among women of reproductive age in Bangladesh, Nepal, and India. *The journal of nutrition* 2009, 139(11):2139-2144.
9. Oddo VM, Bleich SN, Pollack KM, Surkan PJ, Mueller NT, Jones-Smith JC: The weight of work: the association between maternal employment and overweight in low-and middle-income countries. *International Journal of Behavioral Nutrition and Physical Activity* 2017, 14(1):1-10.

10. Lopez LM, Bernholc A, Chen M, Grey TW, Otterness C, Westhoff C, Edelman A, Helmerhorst FM: **Hormonal contraceptives for contraception in overweight or obese women.** *The Cochrane database of systematic reviews* 2016, **2016**(8):Cd008452.
11. de Munter JS, Tynelius P, Magnusson C, Rasmussen F: **Longitudinal analysis of lifestyle habits in relation to body mass index, onset of overweight and obesity: results from a large population-based cohort in Sweden.** *Scandinavian journal of public health* 2015, **43**(3):236-245.
12. Piirtola M, Jelenkovic A, Latvala A, Sund R, Honda C, Inui F, Watanabe M, Tomizawa R, Iwatani Y, Ordonana JR: **Association of current and former smoking with body mass index: A study of smoking discordant twin pairs from 21 twin cohorts.** *PloS one* 2018, **13**(7):e0200140.
13. Chiolero A, Jacot S, Sadowski I, Faeh D, Paccaud F, Cornuz J: **Association of cigarettes smoked daily with obesity in a general adult population.** *Obesity* 2007, **15**(5):1311-1318.
14. Um S, Chan YZC, Tol B, Sopheab H: **Determinants of exclusive breastfeeding of infants under six months among Cambodian mothers.** *Journal of pregnancy* 2020, **2020**.
15. Bursac Z, Gauss CH, Williams DK, Hosmer DW: **Purposeful selection of variables in logistic regression.** *Source code for biology and medicine* 2008, **3**(1):1-8.
16. Um S, Sopheab H, Yom A, Muir JA: **Trends and factors associated with anemia among pregnant women aged 15-49 years old in Cambodia: Data analysis of the Cambodia Demographic and Health Surveys.** *medRxiv* 2022:2022.2009.2008.22279710.
17. Biswas T, Uddin MJ, Mamun AA, Pervin S, P Garnett S: **Increasing prevalence of overweight and obesity in Bangladeshi women of reproductive age: Findings from 2004 to 2014.** *PloS one* 2017, **12**(7):e0181080.
18. Alemu E, Atnafu A, Yitayal M, Yimam K: **Prevalence of overweight and/or obesity and associated factors among high school adolescents in Arada Sub city, Addis Ababa, Ethiopia.** *Journal of nutrition & food sciences* 2014, **4**(2):1.
19. Hamad R, Elser H, Tran DC, Rehkopf DH, Goodman SN: **How and why studies disagree about the effects of education on health: A systematic review and meta-analysis of studies of compulsory schooling laws.** *Social Science & Medicine* 2018, **212**:168-178.
20. Chung A, Backholer K, Wong E, Palermo C, Keating C, Peeters A: **Trends in child and adolescent obesity prevalence in economically advanced countries according to socioeconomic position: a systematic review.** *Obesity reviews* 2016, **17**(3):276-295.
21. Barlow P: **The effect of schooling on women's overweight and obesity: A natural experiment in Nigeria.** *Demography* 2021, **58**(2):685-710.
22. McLaren L: **Socioeconomic status and obesity.** *Epidemiologic reviews* 2007, **29**(1):29-48.
23. Liu H, Guo G: **Lifetime socioeconomic status, historical context, and genetic inheritance in shaping body mass in middle and late adulthood.** *American sociological review* 2015, **80**(4):705-737.
24. Mangemba NT, San Sebastian M: **Societal risk factors for overweight and obesity in women in Zimbabwe: a cross-sectional study.** *BMC public health* 2020, **20**(1):1-8.
25. Kamal SM, Hassan CH, Alam GM: **Dual burden of underweight and overweight among women in Bangladesh: patterns, prevalence, and sociodemographic correlates.** *Journal of health, population, and nutrition* 2015, **33**(1):92.
26. Ghose B: **Frequency of TV viewing and prevalence of overweight and obesity among adult women in Bangladesh: a cross-sectional study.** *BMJ open* 2017, **7**(1):e014399.
27. Islam M, Sathi NJ, Abdullah HM, Naime J, Butt ZA: **Factors Affecting the Utilization of Antenatal Care Services During Pregnancy in Bangladesh and 28 Other Low-and Middle-income Countries: A Meta-analysis of Demographic and Health Survey Data.** *Dr Sulaiman Al Habib Medical Journal* 2022, **4**(1):19-31.
28. Mbochi RW, Kuria E, Kimiywe J, Ochola S, Steyn NP: **Predictors of overweight and obesity in adult women in Nairobi Province, Kenya.** *BMC public health* 2012, **12**(1):1-9.

29. Li W, Wang Y, Shen L, Song L, Li H, Liu B, Yuan J, Wang Y: **Association between parity and obesity patterns in a middle-aged and older Chinese population: a cross-sectional analysis in the Tongji-Dongfeng cohort study.** *Nutrition & metabolism* 2016, **13**(1):1-8.
30. Pasquali R, Vicennati V, Cacciari M, Pagotto U: **The hypothalamic-pituitary-adrenal axis activity in obesity and the metabolic syndrome.** *Annals of the New York Academy of Sciences* 2006, **1083**(1):111-128.
